# Supplementary material for: Arabidopsis ACINUS is O-glycosylated and regulates transcription and alternative splicing of regulators of reproductive transitions
Source: PubMed Central journal article supplement (PMC7878923; doi:10.1038/s41467-021-20929-7), 2021-02-11
Supplement: 41467_2021_20929_MOESM3_ESM.pdf [file 41467_2021_20929_MOESM3_ESM.pdf]

## **Descriptions of Additional Supplementary Files**

### **Supplementary data 1**

**Description:** Summary of reads mapping quality and differentially expressed genes in acinus-2 pinin-1 identified by RNA-seq analysis.

### **Supplementary data 2**

**Description:** Alternative splicing events in acinus-2 pinin-1 identified by RNA-seq analysis.

### **Supplementary data 3**

**Description:** AtACINUS interactome.

### **Supplementary data 4**

**Description:** List of primers used in the study.

### **Supplementary data 5**

**Description:** Targeted quantification on AtACINUS, AtPININ, SR45 and AtSAP18 between Col and acinus-2 pinin-1 mutant.
